# Supplementary material for: PKCμ promotes keratinocyte cell migration through Cx43 phosphorylation-mediated suppression of intercellular communication
Source: iScience. 2024 Jan 29;27(3):109033. doi: 10.1016/j.isci.2024.109033 (PMC10875573; doi:10.1016/j.isci.2024.109033)
Supplement: Document S1. Figures S1–S7 [file mmc1.pdf]

**Supplemental information**

**PKC $\mu$  promotes keratinocyte cell migration**

**through Cx43 phosphorylation-mediated**

**suppression of intercellular communication**

**Renju Pun, Ann M. Cavanaugh, Emily Aldrich, Olivia Tran, Justin C. Rudd, Laura A. Hansen, and Brian J. North**

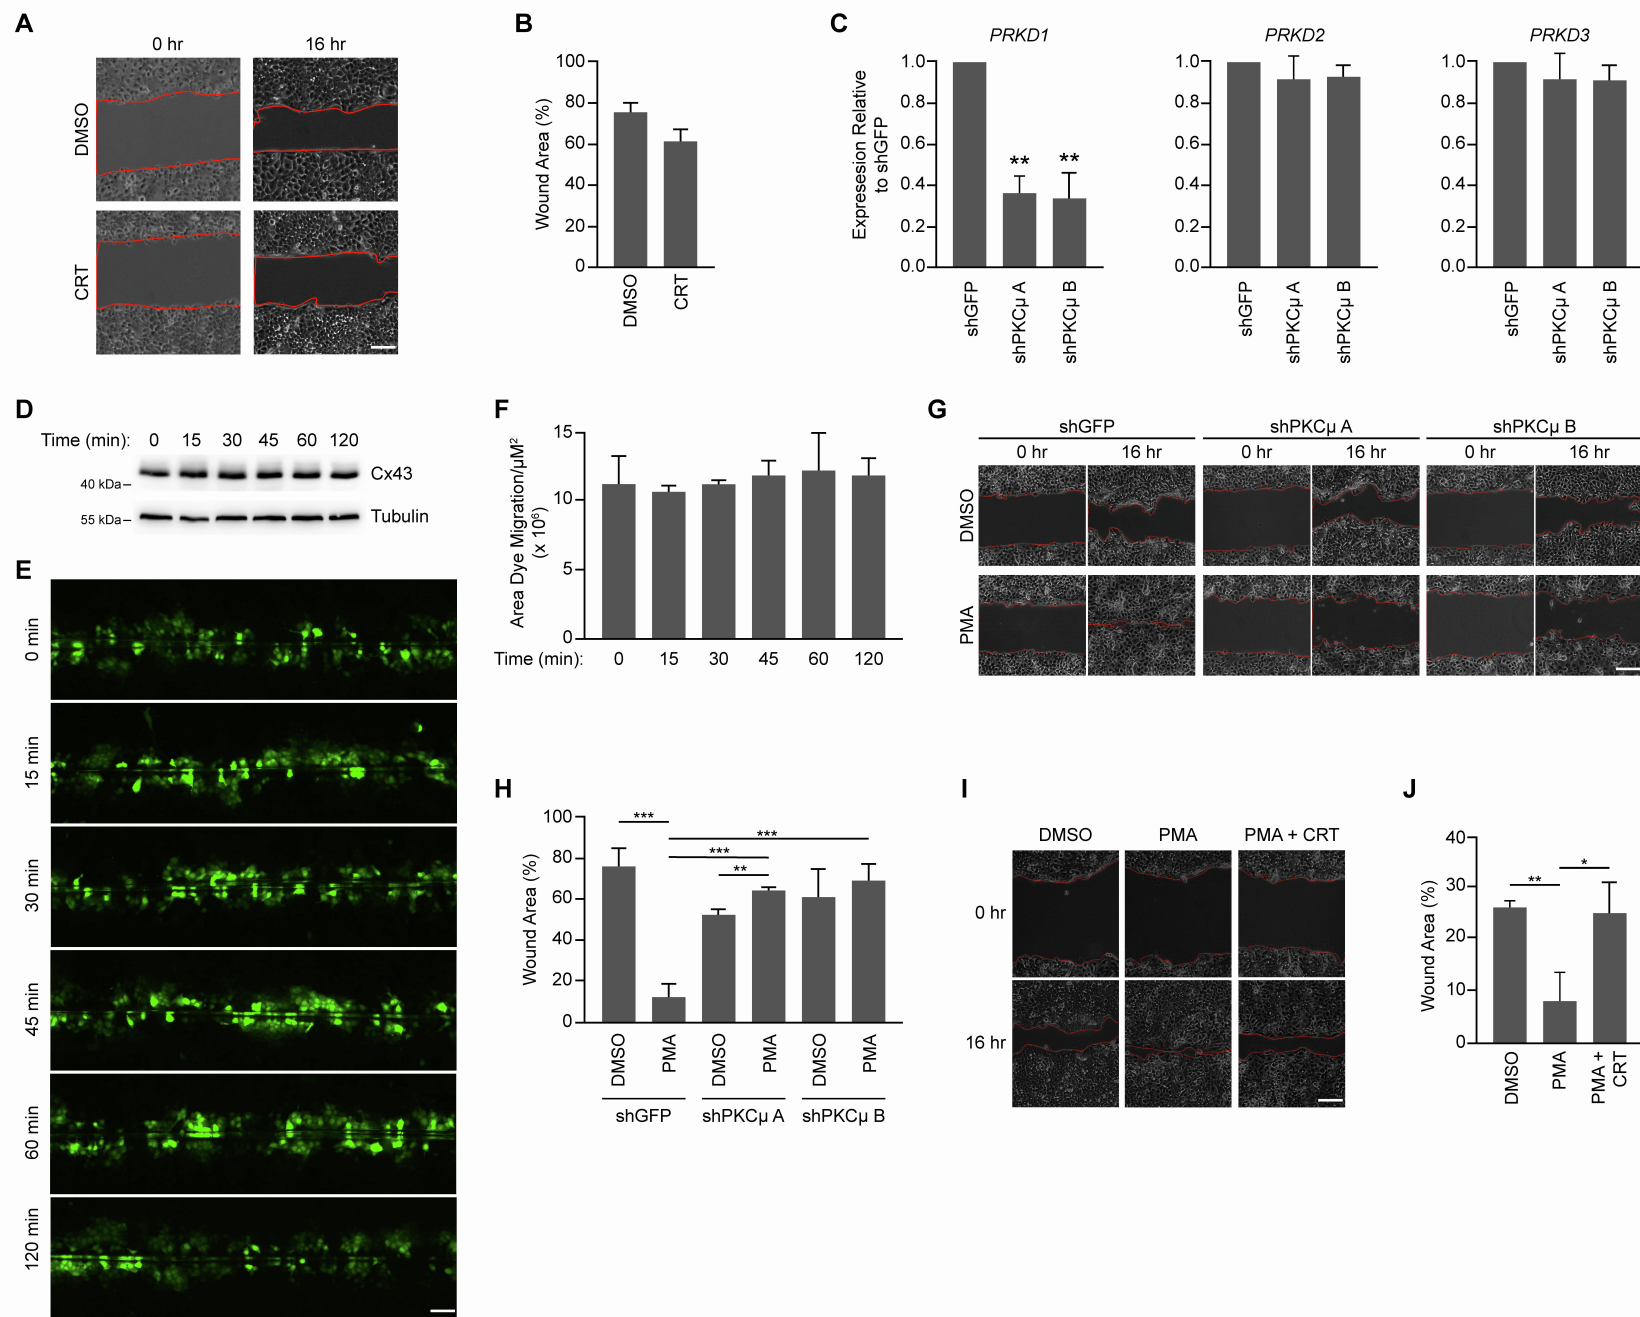

**Figure S1: PKC $\mu$  inhibition with CRT does not influence *in vitro* wound healing, related to**

**Figure 1.** (A) Representative images of *in vitro* wound healing assay of HaCaT cells treated with CRT (1  $\mu$ M) at 0 and 16 hours. Scale bar = 100  $\mu$ m. (B) Percentage of wound area remaining after 16 hours from three replicate experiments as shown in (A). (C) qPCR analysis of *PRKD1*, *PRKD2*, and *PRKD3* mRNA levels in HaCaT cells treated with shGFP, shPKC $\mu$  A, or shPKC $\mu$  B. (D) Western blot showing total Cx43 post following treatment with mitomycin C (5  $\mu$ M). (E) Representative fluorescent microscopic images of SL/DT assay in HaCaT cells treated with mitomycin C for indicated time points. Scale bar = 100  $\mu$ m. (F) Quantification of area of dye migration based on three replicates of experiment shown in (D). (G) Representative images of *in vitro* wound healing assay of serum starved HaCaT cells expressing shGFP, shPKC $\mu$  A, or shPKC $\mu$  B at 0 and 16 hours. Scale bar = 100  $\mu$ m. (H) Percentage of remaining wound area at 16 hours of experiment shown in (G). (I) Representative images of *in vitro* wound healing assay of HaCaT cells under normal growth conditions at 0 and 16 hours. Scale bar = 100  $\mu$ m. (J) Percentage of remaining wound area at 16 hours of experiment shown in (I). All calculations are based on three replicates  $\pm$  S.D. \* $p$ <0.05, \*\* $p$ <0.01, \*\*\* $p$ <0.001 (Student's t-test).

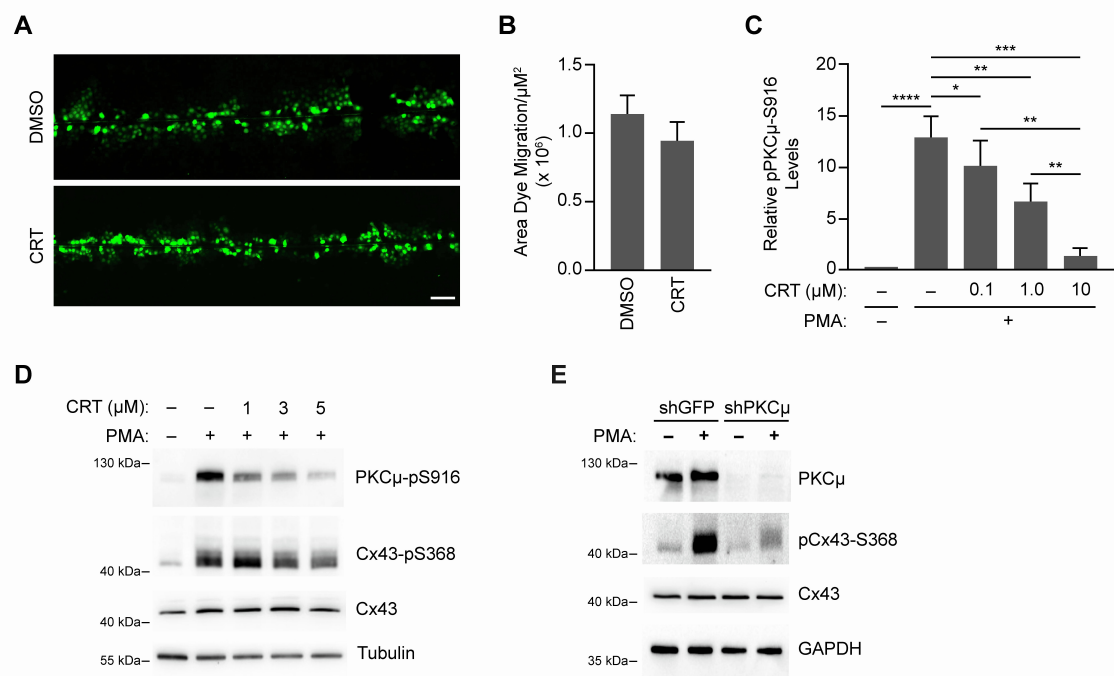

**Figure S2: PKC $\mu$  inhibition with CRT alone does not affect dye migration through gap junctions, related to Figure 2.** (A) Representative fluorescent microscopic images of SL/DT assay in HaCaT cells treated with CRT (5  $\mu$ M) for 6 hours. Scale bar = 100  $\mu$ m. (B) Quantification of dye migration area from three replicate experiments as shown in (A). (C) Quantification of pPKC $\mu$ -S916 following treatment with CRT at indicated concentrations compared to DMSO control based on densitometric analysis from three replicate experiments as shown in (Figure 2F). (D) MEF cells treated with an increasing concentration of CRT in the presence or absence of 0.5  $\mu$ M PMA and probed for pPKC $\mu$ -S916, pCx43-S368, total Cx43, and Tubulin. (E) MEF cells expressing shGFP (control) and shPKC $\mu$  treated with or without 0.5  $\mu$ M PMA and probed for total PKC $\mu$ , pCx43-S368, total Cx43, and GAPDH. All calculations are based on three replicates  $\pm$  S.D. \* $p$ <0.05, \*\* $p$ <0.01, \*\*\* $p$ <0.001 (Student's t-test).

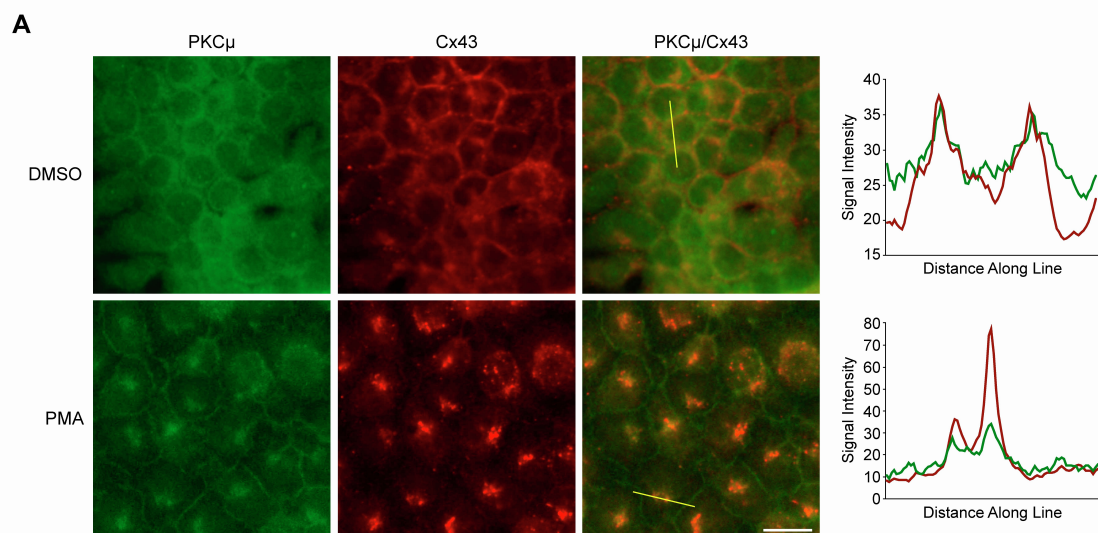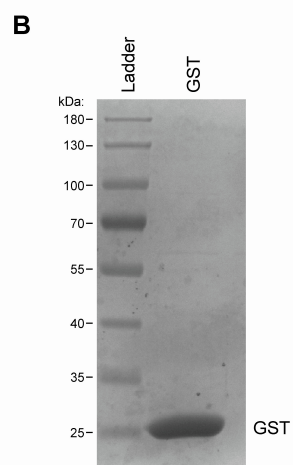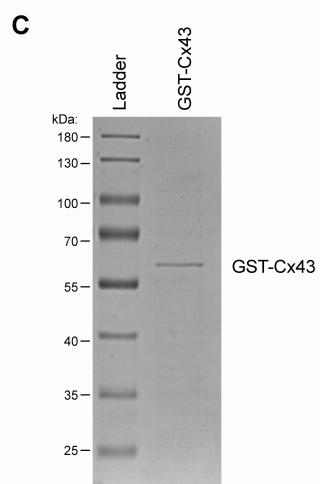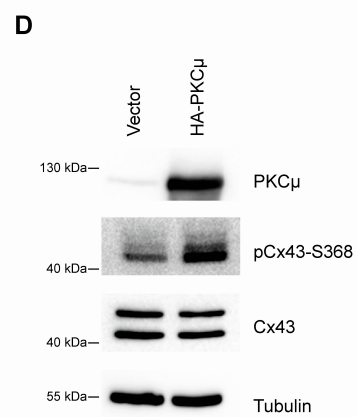

**Figure S3: PKC $\mu$  and Cx43 colocalize at the cell membrane and in the cytosol post PMA treatment, related to Figure 3.** (A) Representative immunofluorescence images of HaCaT cells treated with or without PMA (0.5  $\mu$ M) stained for PKC $\mu$  and Cx43. Signal intensity plots of both channels across indicated line in merged image is shown. Scale bar = 20  $\mu$ m. (B) Coomassie blue stained SDS-PAGE gel of purified recombinant GST protein (26 kDa) from BL21 *E. coli*. (C) Coomassie blue stained SDS-PAGE gel of purified recombinant GST-Cx43 protein (69 kDa) from BL21 *E. coli*. (D) Western blots of cell lysates from 293T cells transfected with control vector or HA-PKC $\mu$  probed pPKC $\mu$ , pCx43-S368, total Cx43, and Tubulin.

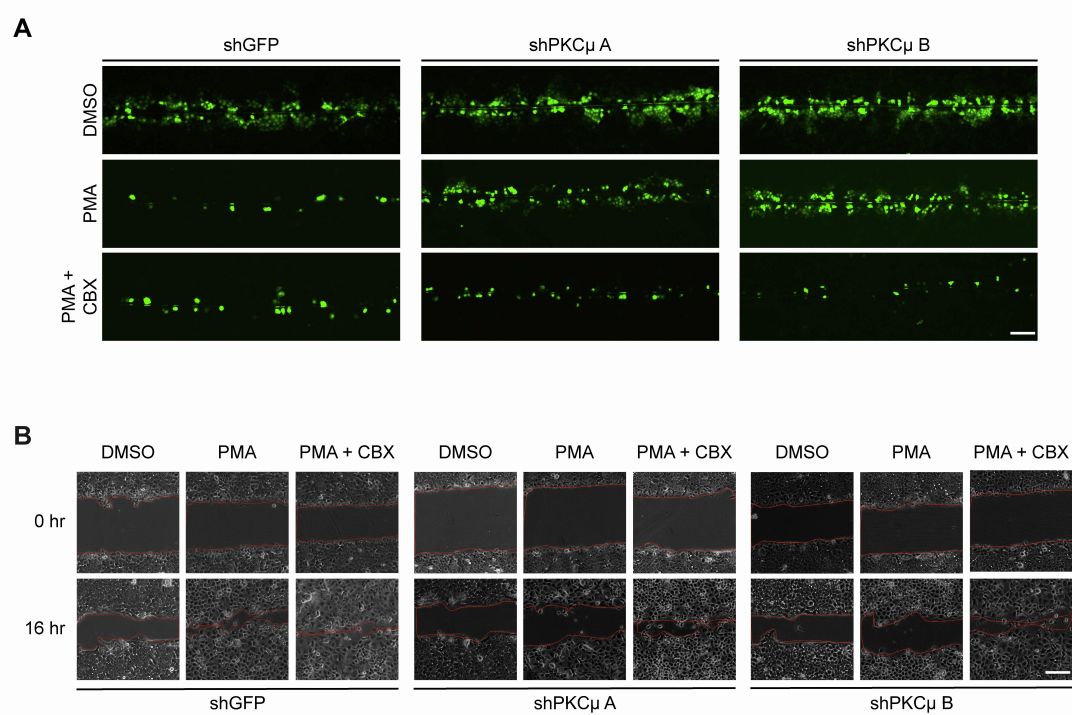

**Figure S4: Inhibition of Cx43 with CBX reduces intercellular communication through gap junctions, related to Figure 5.** (A) Representative fluorescence microscopic images of SL/DT assay in HaCaT cells expressing shGFP, shPKC $\mu$  A, or shPKC $\mu$  B, and in the absence or presence of CBX (100  $\mu$ M) for 6 hours, followed by PMA (0.5  $\mu$ M) for 30 min. Scale bar = 100  $\mu$ m. (B) Representative images of *in vitro* wound healing assay of HaCaT cells expressing shGFP, shPKC $\mu$  A, or shPKC $\mu$  B treated with PMA (10 nM) with or without CBX (50  $\mu$ M) at 0 and 16 hours. Scale bar = 100  $\mu$ m.

**A**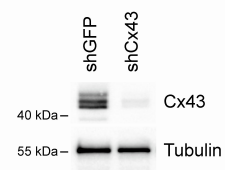**B**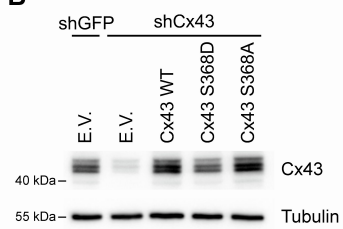

**Figure S5: Cx43-depletion and reconstitution with Cx43 wild-type, S368D, and S368A in HaCaT cells, related to Figures 5 and 6.** (A) Western blot of cell lysates from HaCaT cells expressing shGFP and shCx43 and probed for Cx43 and Tubulin. (B) Western blot of cell lysates from shCx43 expressing HaCaT cells reconstituted with ectopic expression of Cx43 wild-type, S368D, and S368A probed for Cx43 and Tubulin.

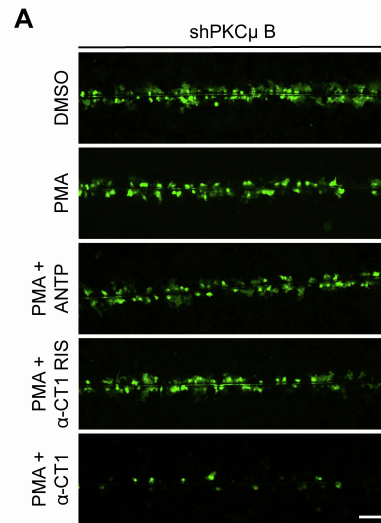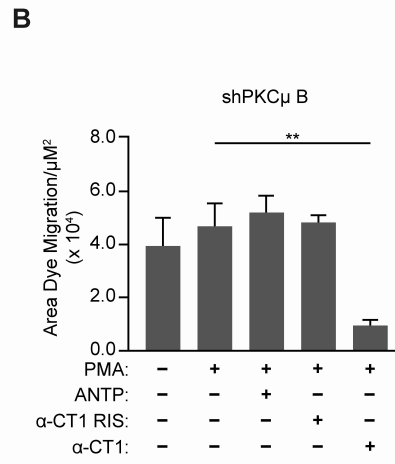

**Figure S6: Inhibition of Cx43 with  $\alpha$ -CT1 reduces intercellular communication through gap junctions, related to Figure 7.** (A) Representative fluorescent microscopic images of SL/DT assay in HaCaT cells expressing shPKC $\mu$  B, and in the absence or presence of ANTP,  $\alpha$ -CT1 RIS, or  $\alpha$ -CT1 peptides (each at 100  $\mu$ M) for 6 hours followed by PMA (10 nM) for 30 min. Scale bar = 100  $\mu$ m. (B) Quantification of dye migration area from three replicate experiments as shown in (A). All calculations are based on three replicates  $\pm$  S.D. **\*\* $p$ <0.01** (Student's t-test).

**A**

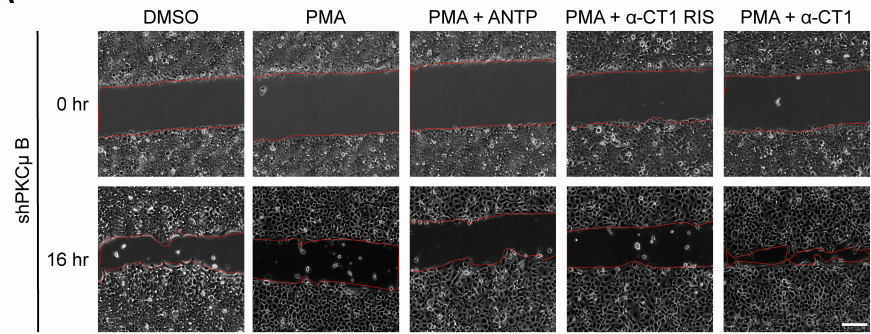

**B**

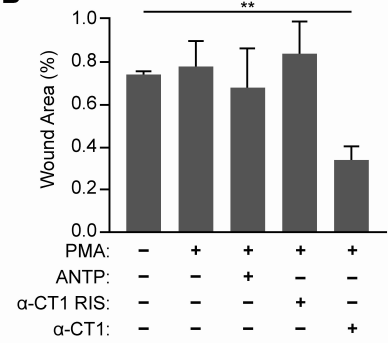

**Figure S7: Inhibition of Cx43 with  $\alpha$ -CT1 increases wound healing in shPKC $\mu$  treated cells, related to Figure 7.** (A) Representative images of *in vitro* wound healing assay at 0 and 16 hours on HaCaT cells transduced with an shRNA directed against PKC $\mu$  treated with PMA (10 nM) in the absence or presence of ANTP,  $\alpha$ -CT1 RIS, or  $\alpha$ -CT1 peptides (each at 100  $\mu$ M). Scale bar = 100  $\mu$ m. (B) Percentage of wound area remaining after 16 hours from three replicate experiments as shown in (A). All calculations are based on three replicates  $\pm$  S.D. **\*\* $p$ <0.01** (Student's t-test).
